# Supplementary material for: Fabrication of novel Z-scheme InVO4/CdS heterojunctions with efficiently enhanced visible light photocatalytic activity
Source: Royal Society of Chemistry journal article supplement (doi:10.1039/c6ce02465c), 2017-01-01
Supplement: c6ce02465c1.pdf [file c6ce02465c1.pdf]

## Supporting Information

### **Fabrication of novel InVO<sub>4</sub>/CdS heterojunctions with efficiently enhanced visible-light photocatalytic activity**

Yadong Meng<sup>a</sup>, Yuanzhi Hong<sup>b</sup>, Changyou Huang<sup>a</sup> and Weidong Shi<sup>\*a</sup>

<sup>a</sup>School of Chemistry and Chemical Engineering, Jiangsu University, Zhenjiang, 212013, P. R. China

<sup>b</sup>School of Materials Science and Engineering, Jiangsu University, Zhenjiang, 212013, P. R. China

*\*Corresponding author: Tel.: +86 511 8879 0187*

*Fax: +86 511 8879*

*1108*

*E-mail: swd1978@ujs.edu.cn*

| Element | Samples |        |        |        |
|---------|---------|--------|--------|--------|
|         | 10% IC  | 20% IC | 40% IC | 60% IC |
| O K     | 6.05    | 11.26  | 16.39  | 18.55  |
| S K     | 18.53   | 16.18  | 15.77  | 13.97  |
| V K     | 1.20    | 2.76   | 3.18   | 4.73   |
| Cd L    | 71.56   | 64.47  | 53.96  | 47.33  |
| In L    | 2.66    | 5.33   | 10.70  | 15.42  |
| Total   | 100     | 100    | 100    | 100    |

**Table. S1** EDX element analysis over all InVO<sub>4</sub>/CdS composites.

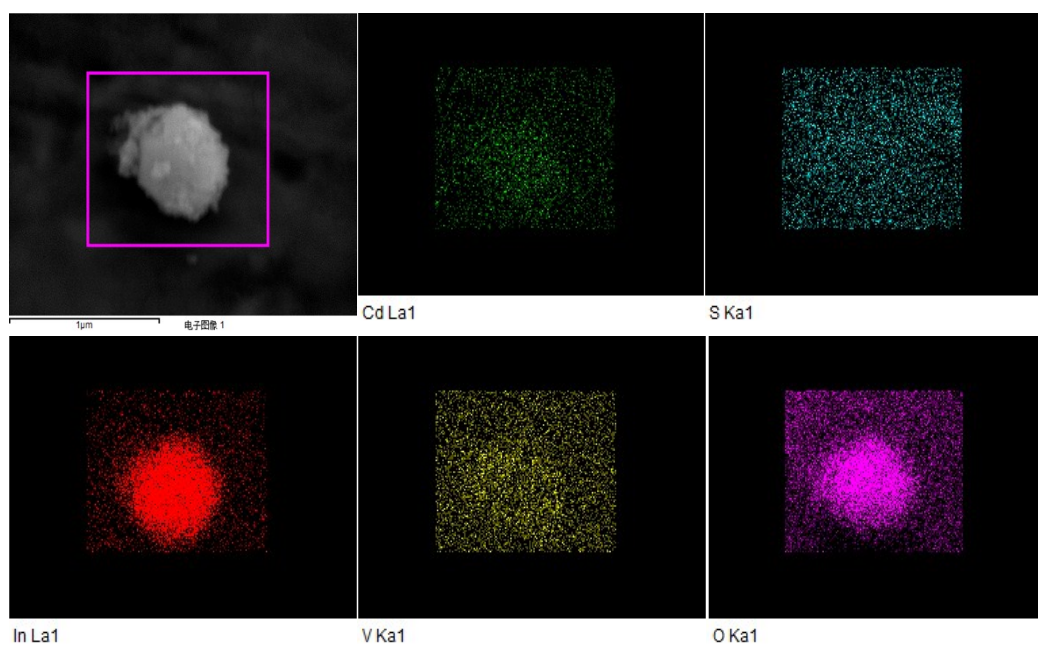

**Fig. S1** EDS mapping of as-prepared 40% IC sample.

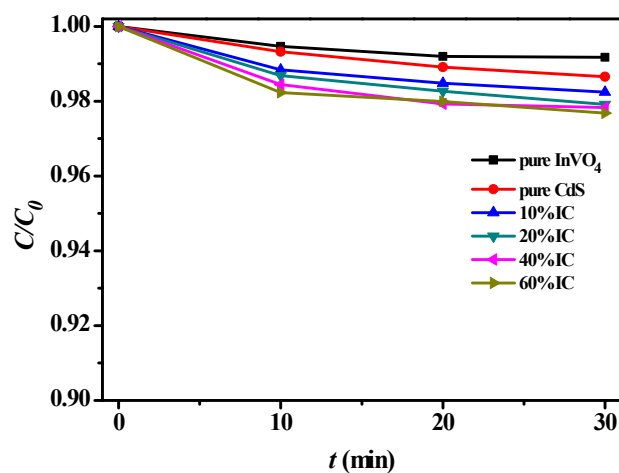

**Fig. S2** The adsorption/desorption equilibrium of as-prepared samples.

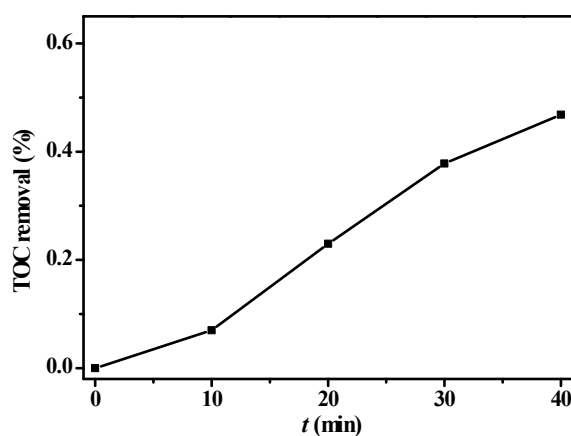

**Fig. S3** TOC removal curves over 40% IC sample under visible light.

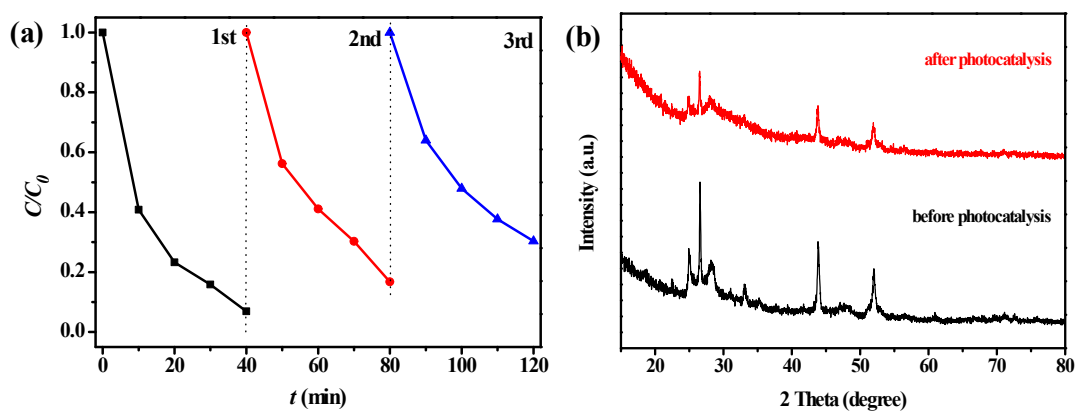

**Fig. S4** (a) The three cycles photocatalytic degradation of RhB over 40% IC sample under visible light irradiation; (b) XRD patterns of 40% IC sample before and after 3 times run cycle photocatalytic tests.
